# Supplementary material for: Bacillus thuringiensis Vip1 Functions as a Receptor of Vip2 Toxin for Binary Insecticidal Activity against Holotrichia parallela
Source: MDPI journal article supplement (doi:10.3390/toxins11080440), 2019-07-25
Supplement: s1 [file s1]

# Supplementary Materials: *Bacillus thuringiensis* Vip1 Functions as a Receptor of Vip2 Toxin for Binary Insecticidal Activity against *Holotrichia parallela*

Jianxun Geng, Jian Jiang, Changlong Shu, Zeyu Wang, Fuping Song, Lili Geng, Jiangyan Duan and Jie Zhang

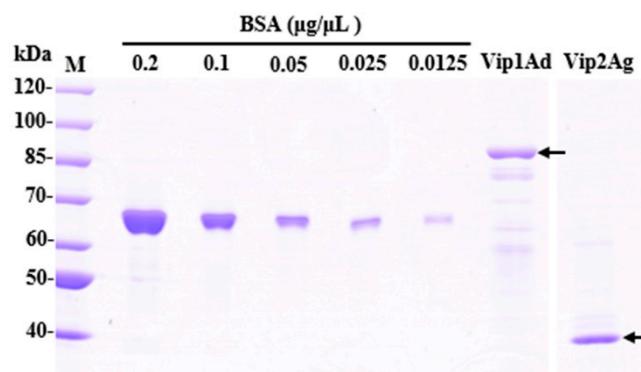

**Figure S1.** Analysis of Vip1Ad and Vip2Ag expression levels in fermentation broth. The expression of Vip1Ad and Vip2Ag was analyzed by SDS-PAGE. The concentrations of Vip1Ad and Vip2Ag extracts were determined by ImageJ Software using different concentrations of bovine serum albumin (BSA) as a standard. Arrowheads indicate the expressed Vip1Ad and Vip2Ag.

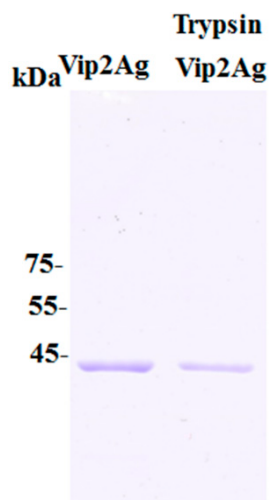

**Figure S2.** SDS-PAGE analysis of Vip2Ag was digested by trypsin.

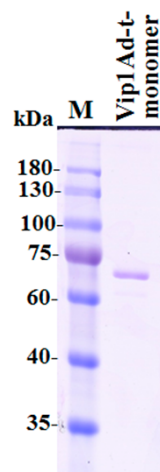

**Figure S3.** SDS-PAGE analysis of Vip1Ad-t-monomer was purified by Superdex-75 gel filtration chromatography.

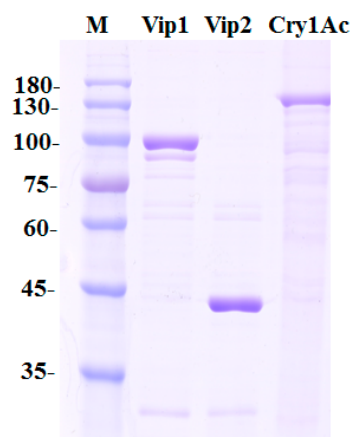

**Figure S4.** Comparison of Vip1Ad, Vip2Ag and Cry1Ac protein expression level.
